# Supplementary material for: Patient-reported outcomes in a phase II, North American study of alectinib in patients with ALK-positive, crizotinib-resistant, non-small cell lung cancer
Source: PubMed Central journal article supplement — ESMO Open. 2018 Jul 12;3(5):e000364. doi: 10.1136/esmoopen-2018-000364 (PMC6045737; doi:10.1136/esmoopen-2018-000364), 2018-07-12
Supplement: esmoopen-2018-000364supp001.pdf [file esmoopen-2018-000364supp001.pdf]

## **Supplementary materials**

### **Patient-reported outcomes in a phase II, North American study of alectinib in patients with ALK-positive, crizotinib-resistant, non-small-cell lung cancer**

Sai-Hong Ignatius Ou, Mark A. Socinski, Shirish Gadgeel, Leena Gandhi, Howard West, Alberto Chiappori, Victor Cohen, Gregory J. Riely, Vlatka Smoljanovic, Walter Bordogna, Elaine Wright, Kendra DeBusk, Ali Zeaiter, Alice T. Shaw

**Supplementary figure 1.** Correlation of best overall response with HRQoL in terms of: (A) emotional functioning and (B) cognitive functioning.

HRQoL, health-related quality of life; QLQ-C, Quality of Life Questionnaire-Core.

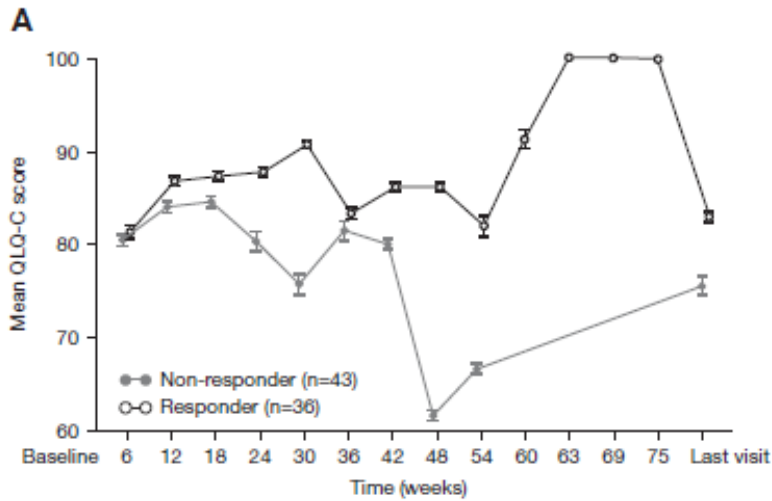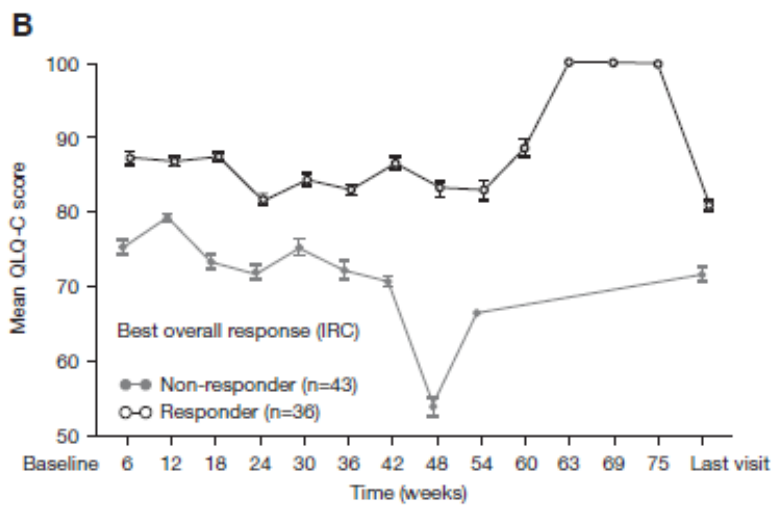

**Supplementary table 1** Mean and median baseline values for the QLQ-C30 and QLQ-LC13 according to ECOG PS score

|                                | <b>ECOG PS 0</b>     | <b>ECOG PS 0</b> | <b>ECOG PS 1</b>     | <b>ECOG PS 1</b> | <b>ECOG PS 2</b>     | <b>ECOG PS 2</b> |
|--------------------------------|----------------------|------------------|----------------------|------------------|----------------------|------------------|
|                                | <b>(n=30)</b>        | <b>(n=30)</b>    | <b>(n=48)</b>        | <b>(n=48)</b>    | <b>(n=9)</b>         | <b>(n=9)</b>     |
|                                | <b>mean ± SD</b>     | <b>median</b>    | <b>mean ± SD</b>     | <b>median</b>    | <b>mean ± SD</b>     | <b>median</b>    |
| Global Health Status (QLQ-C30) | 65.74 ± 20.46        | 75.00            | 48.67 ± 24.24        | 50.00            | 39.58 ± 21.25        | 37.50            |
| Functioning (QLQ-C30)          |                      |                  |                      |                  |                      |                  |
| Physical                       | <b>86.91 ± 15.96</b> | <b>93.33</b>     | <b>65.00 ± 21.81</b> | <b>63.33</b>     | <b>40.00 ± 22.25</b> | <b>40.00</b>     |
| Social                         | <b>75.31 ± 26.70</b> | <b>66.67</b>     | <b>57.58 ± 37.26</b> | <b>66.67</b>     | <b>27.08 ± 23.46</b> | <b>25.00</b>     |
| Role                           | <b>77.16 ± 31.06</b> | <b>100</b>       | <b>53.41 ± 31.66</b> | <b>66.67</b>     | <b>27.08 ± 23.46</b> | <b>33.33</b>     |
| Cognitive                      | <b>91.36 ± 12.55</b> | <b>100</b>       | <b>71.21 ± 25.76</b> | <b>66.67</b>     | <b>68.75 ± 27.37</b> | <b>66.67</b>     |
| Emotional                      | <b>82.10 ± 16.29</b> | <b>83.33</b>     | <b>69.26 ± 23.01</b> | <b>70.83</b>     | <b>67.71 ± 20.62</b> | <b>70.83</b>     |
| Symptoms (QLQ-C30)             |                      |                  |                      |                  |                      |                  |
| Fatigue                        | <b>30.45 ± 21.48</b> | <b>33.33</b>     | <b>51.01 ± 26.61</b> | <b>44.44</b>     | <b>66.67 ± 22.22</b> | <b>61.11</b>     |
| Nausea and vomiting            | <b>11.11 ± 17.30</b> | <b>0.00</b>      | <b>16.67 ± 21.26</b> | <b>8.33</b>      | <b>25.00 ± 26.73</b> | <b>16.67</b>     |
| Pain                           | <b>19.75 ± 23.59</b> | <b>16.67</b>     | <b>44.70 ± 34.25</b> | <b>33.33</b>     | <b>45.83 ± 41.55</b> | <b>41.67</b>     |
| Dyspnoea                       | 22.22 ± 26.15        | 33.33            | 40.31 ± 32.17        | 33.33            | 33.33 ± 30.86        | 33.33            |
| Insomnia                       | 24.69 ± 27.10        | 33.33            | 37.88 ± 33.40        | 33.33            | 16.67 ± 17.82        | 16.67            |

|                             |                      |              |                      |              |                      |              |
|-----------------------------|----------------------|--------------|----------------------|--------------|----------------------|--------------|
| Appetite loss               | <b>18.52 ± 28.24</b> | <b>0.00</b>  | <b>34.09 ± 35.57</b> | <b>33.33</b> | <b>45.83 ± 24.80</b> | <b>33.33</b> |
| Constipation                | <b>12.35 ± 16.40</b> | <b>0.00</b>  | <b>19.70 ± 25.23</b> | <b>0.00</b>  | <b>50.00 ± 39.84</b> | <b>50.00</b> |
| Diarrhoea                   | 13.58 ± 24.91        | 0.00         | 13.95 ± 23.27        | 0.00         | 8.33 ± 15.43         | 0.00         |
| <hr/>                       |                      |              |                      |              |                      |              |
| Symptoms (QLQ-LC13)         |                      |              |                      |              |                      |              |
| <hr/>                       |                      |              |                      |              |                      |              |
| Dyspnoea                    | 19.75 ± 22.51        | 11.11        | 39.68 ± 27.01        | 33.33        | 20.63 ± 28.28        | 33.33        |
| Cough                       | 27.16 ± 24.52        | 33.33        | 39.39 ± 29.00        | 33.33        | 25.00 ± 23.57        | 33.33        |
| Haemoptysis                 | 1.23 ± 6.42          | 0.00         | 1.52 ± 7.02          | 0.00         | 0.00 ± 0.00          | 0.00         |
| Sore mouth                  | <b>0.00 ± 0.00</b>   | <b>0.00</b>  | <b>7.58 ± 20.16</b>  | <b>0.00</b>  | <b>8.33 ± 15.43</b>  | <b>0.00</b>  |
| Dysphagia                   | <b>0.00 ± 0.00</b>   | <b>0.00</b>  | <b>6.06 ± 13.01</b>  | <b>0.00</b>  | <b>12.50 ± 17.25</b> | <b>0.00</b>  |
| Peripheral neuropathy       | 7.41 ± 19.25         | 0.00         | 16.67 ± 23.29        | 0.00         | 12.50 ± 24.80        | 0.00         |
| Alopecia                    | <b>8.64 ± 17.52</b>  | <b>0.00</b>  | <b>13.18 ± 28.30</b> | <b>0.00</b>  | <b>14.29 ± 37.80</b> | <b>0.00</b>  |
| Pain in the chest           | 17.28 ± 21.42        | 0.00         | 25.00 ± 33.04        | 0.00         | 16.67 ± 17.82        | 16.67        |
| Pain in the arm or shoulder | 9.88 ± 20.29         | 0.00         | 21.97 ± 30.45        | 0.00         | 12.50 ± 35.36        | 0.00         |
| Pain in other parts         | <b>32.05 ± 29.03</b> | <b>33.33</b> | <b>49.59 ± 38.09</b> | <b>33.33</b> | <b>54.17 ± 43.42</b> | <b>50.00</b> |

ECOG PS, Eastern Cooperative Oncology Group Performance Status; QLQ-C30, Quality of Life Questionnaire-Core 30-item;

QLQ-LC13, Quality of Life Questionnaire-lung cancer-specific module.

Values in **bold** represent a higher baseline score associated with a higher ECOG PS.
